# Supplementary material for: Oxidant free dehydrogenation of alcohols using chitosan/polyacrylamide entrapped Ag nanoparticles
Source: Royal Society of Chemistry journal article supplement (doi:10.1039/c5ra05046d), 2015-01-01

## Oxidant- free dehydrogenation of alcohols using chitosan/polyacrylamide entrapped Ag nano particles

Deepak K. Kurhe and Radha V. Jayaram\*

Department of Chemistry, Institute of Chemical Technology

Matunga, Mumbai, India 400 019

E-mail: rv.jayaram@ictmumbai.edu.in

Tel. + 91 22 3361 2607

### Analytic data of products

#### 1. Acetophenone

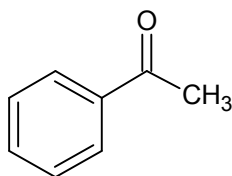

<sup>1</sup>H NMR

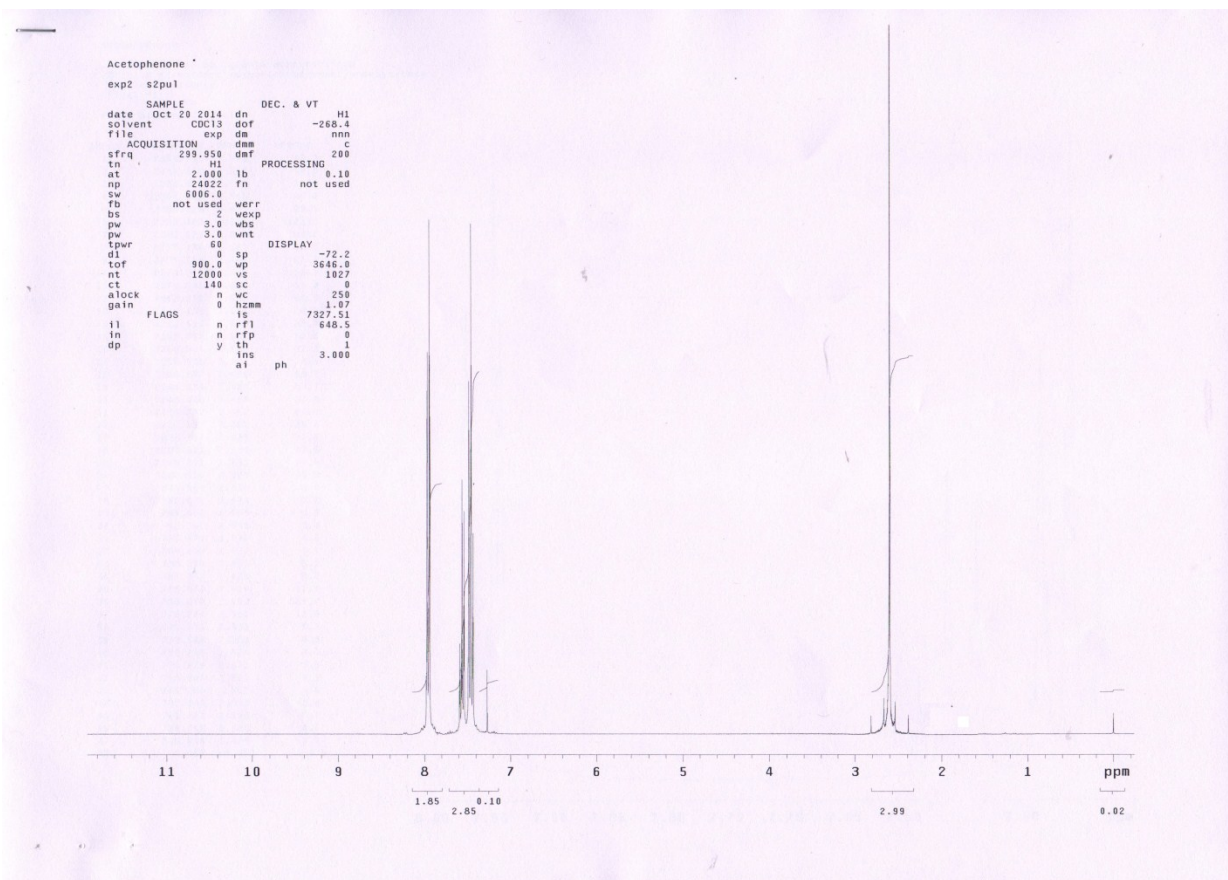

## GC-MS

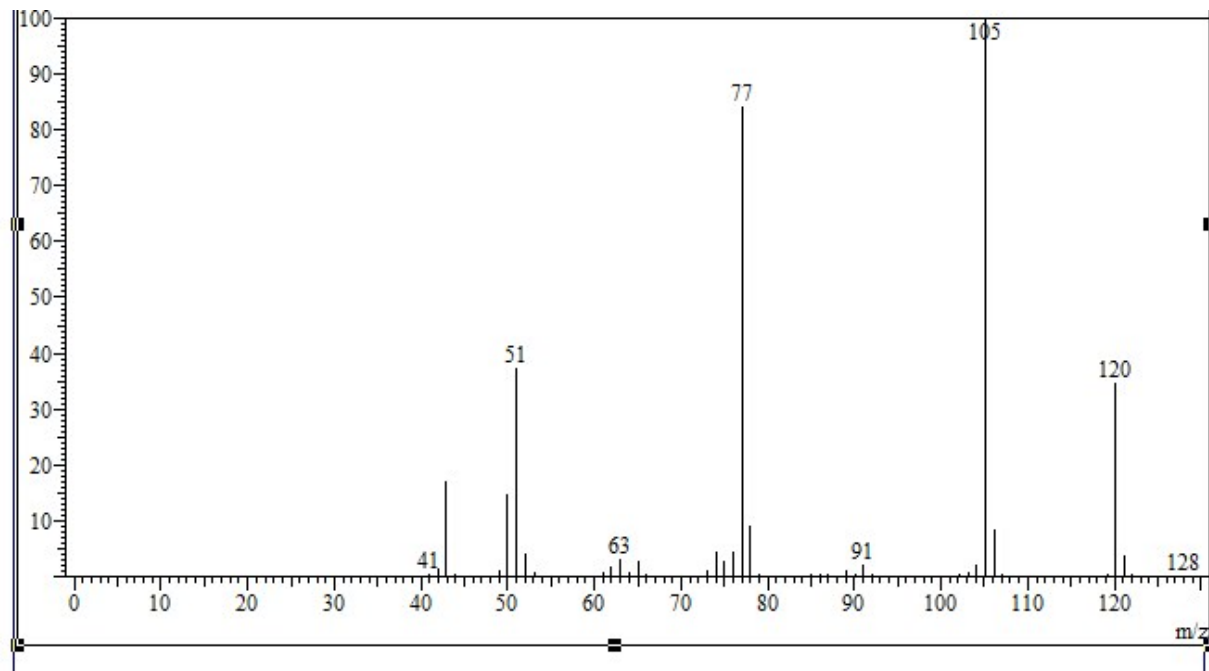

## 2. Benzophenone

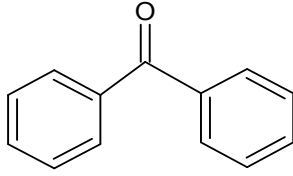

### <sup>1</sup>H NMR

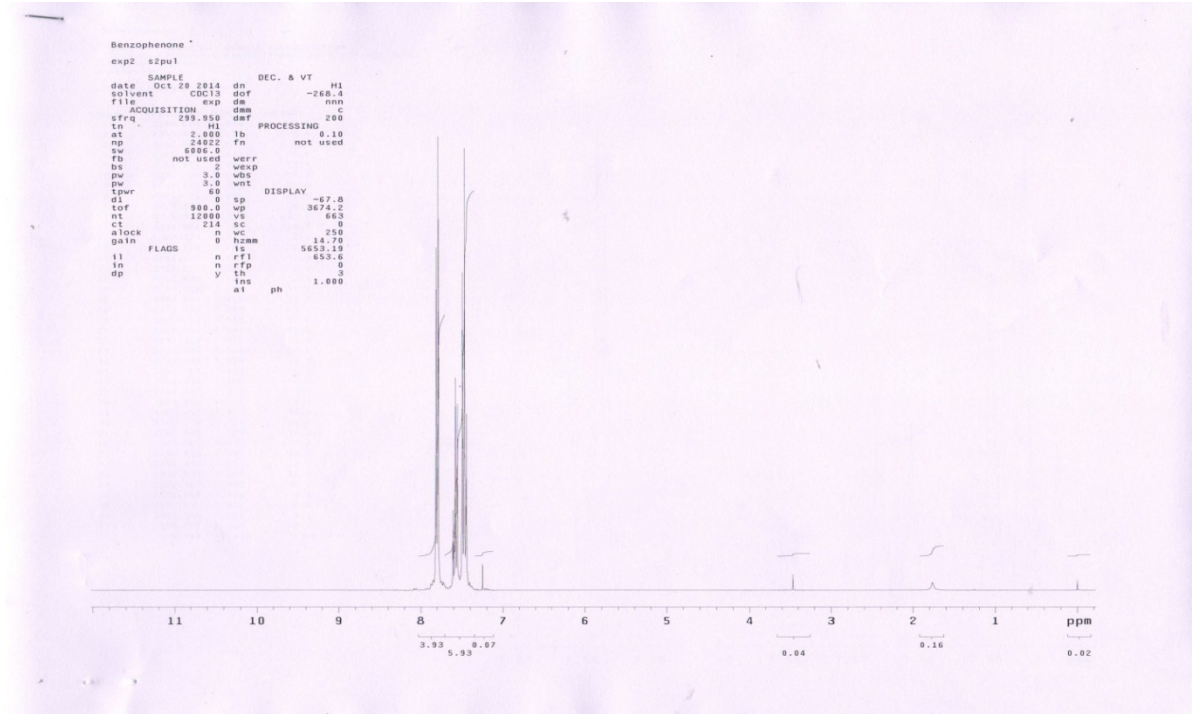

### GC-MS

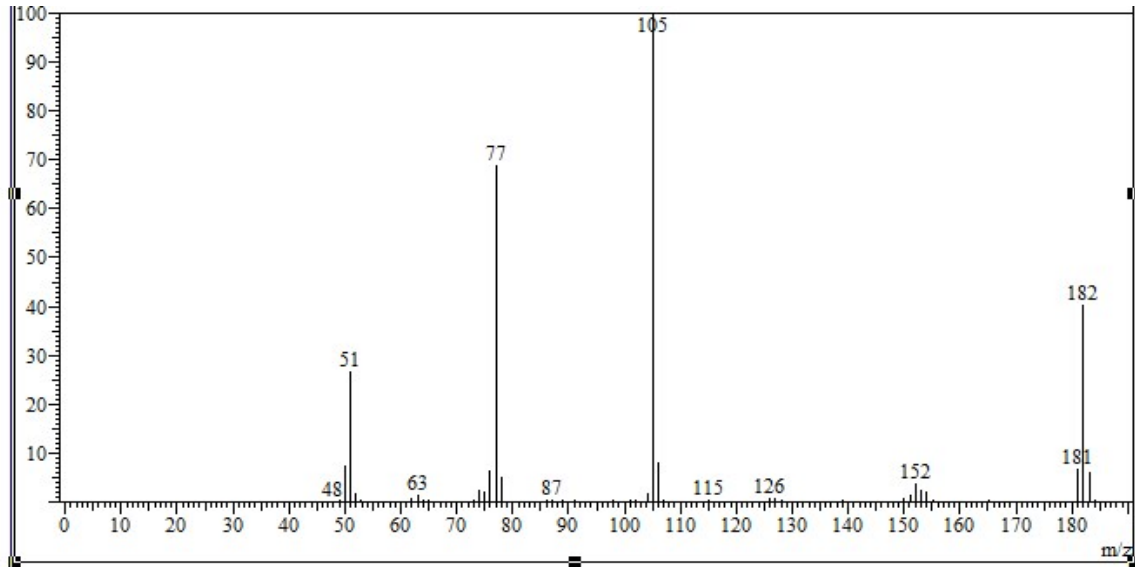

### 3. Cyclopropyl phenyl ketone

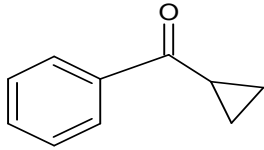

### <sup>1</sup>H NMR

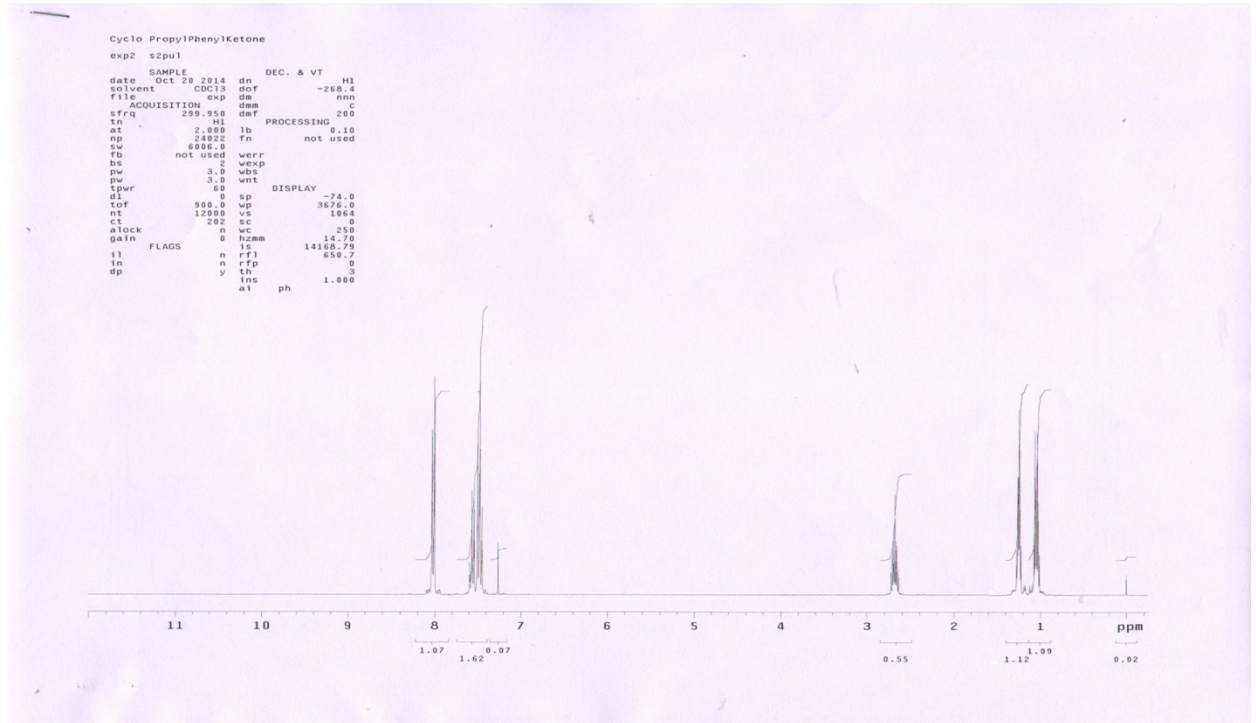

### GC-MS

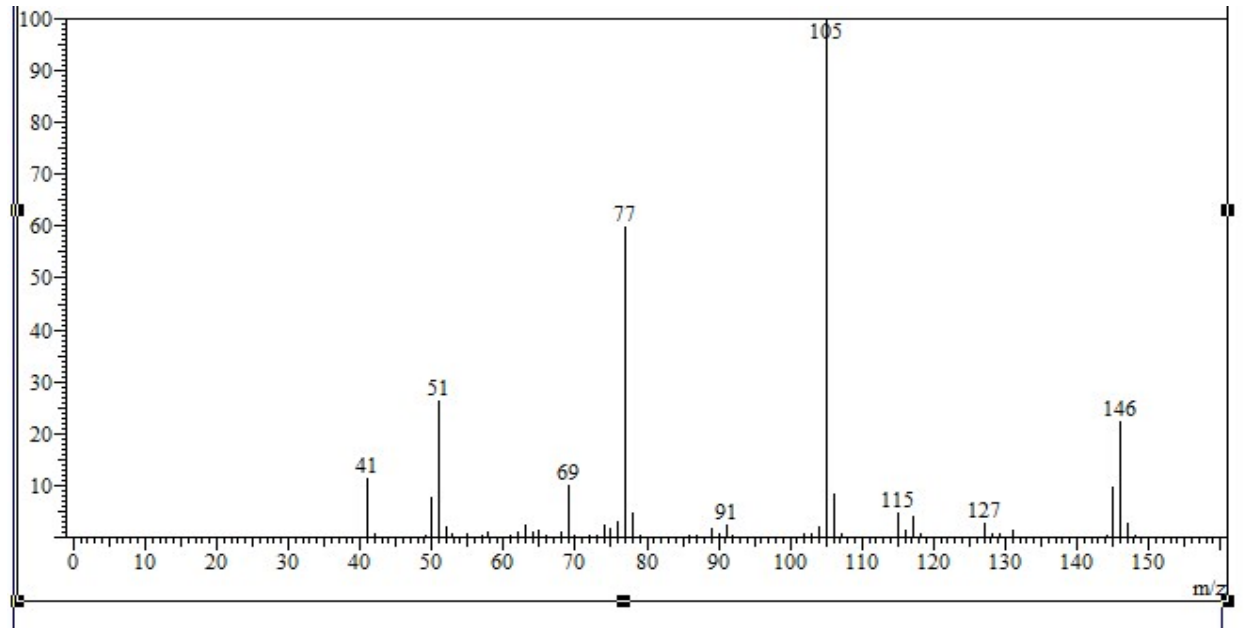

### 4. Benzaldehyde

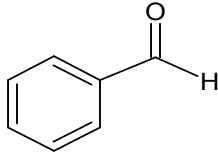

### <sup>1</sup>H NMR

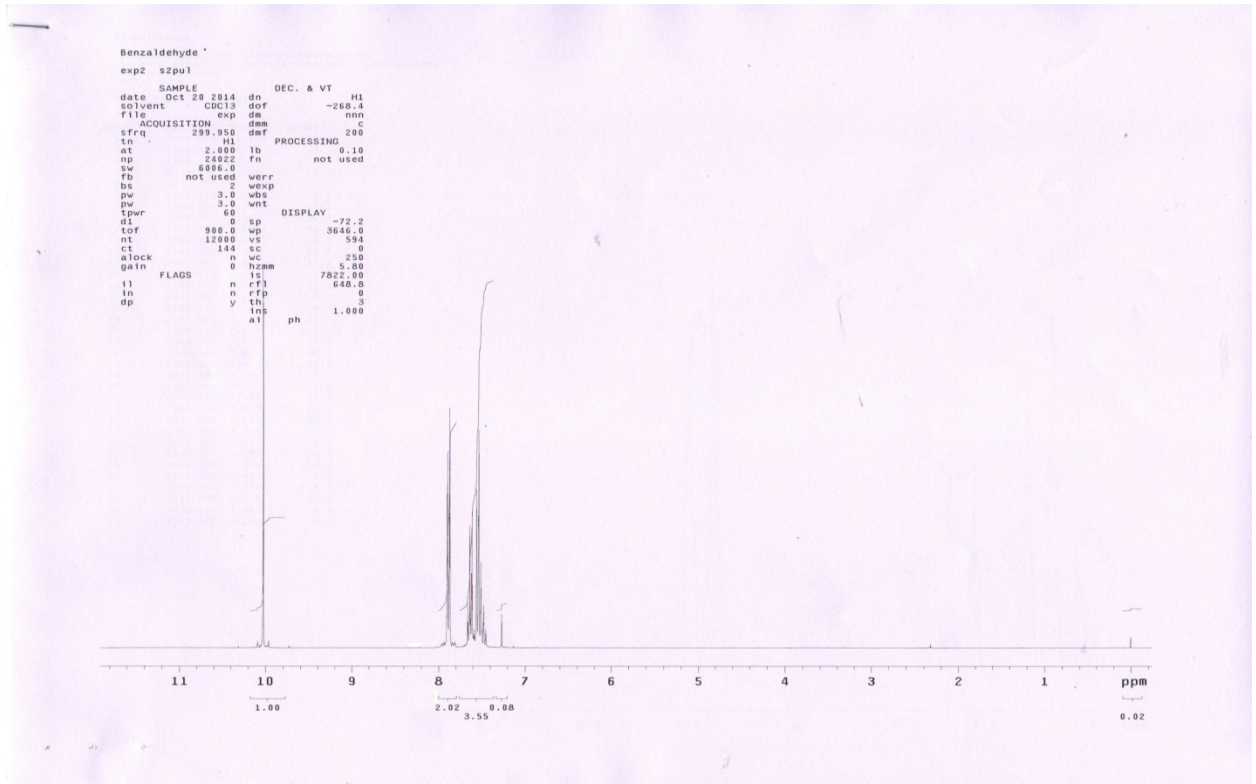

### GC-MS

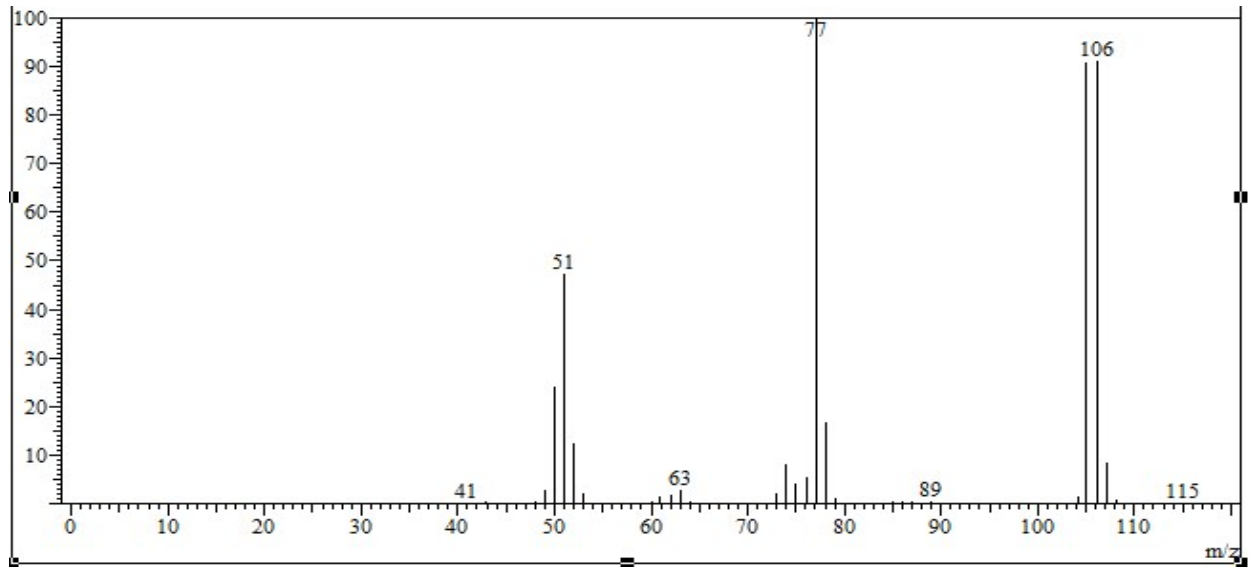

### 5. 2 Chloro benzaldehyde

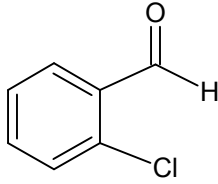

### <sup>1</sup>H NMR

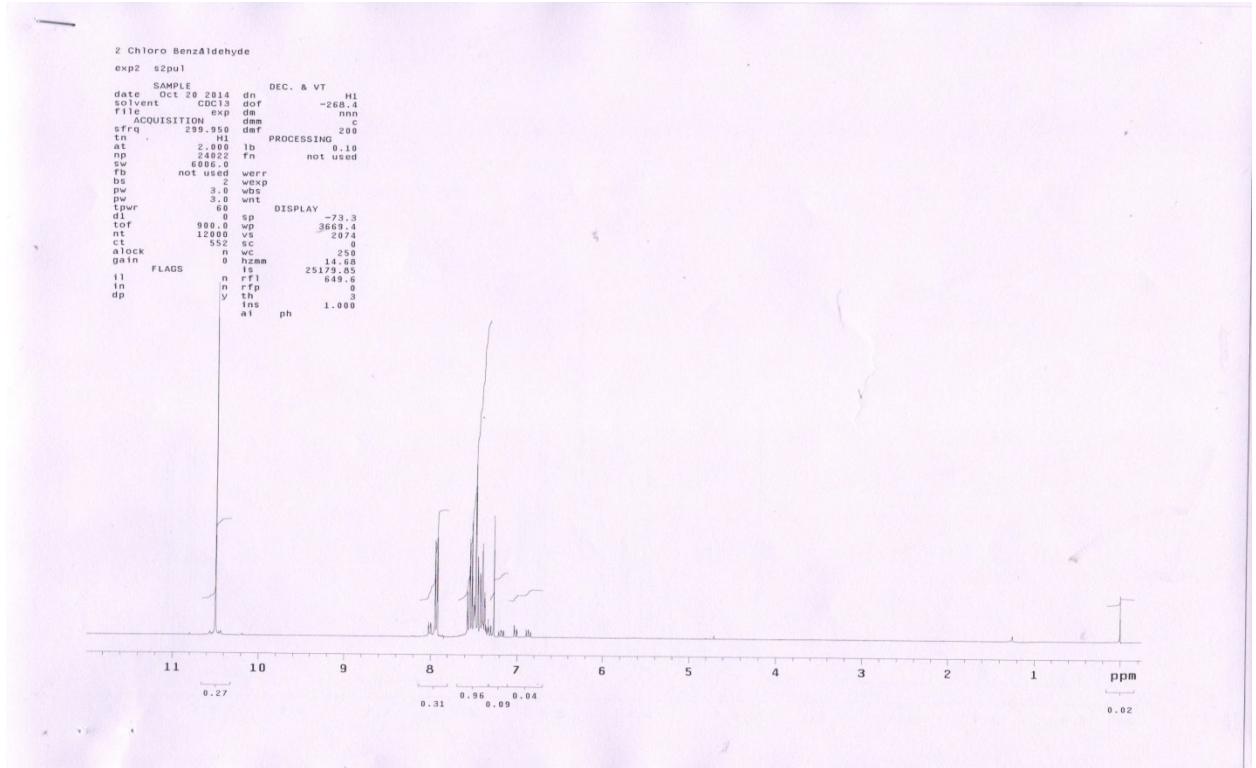

### GC-MS

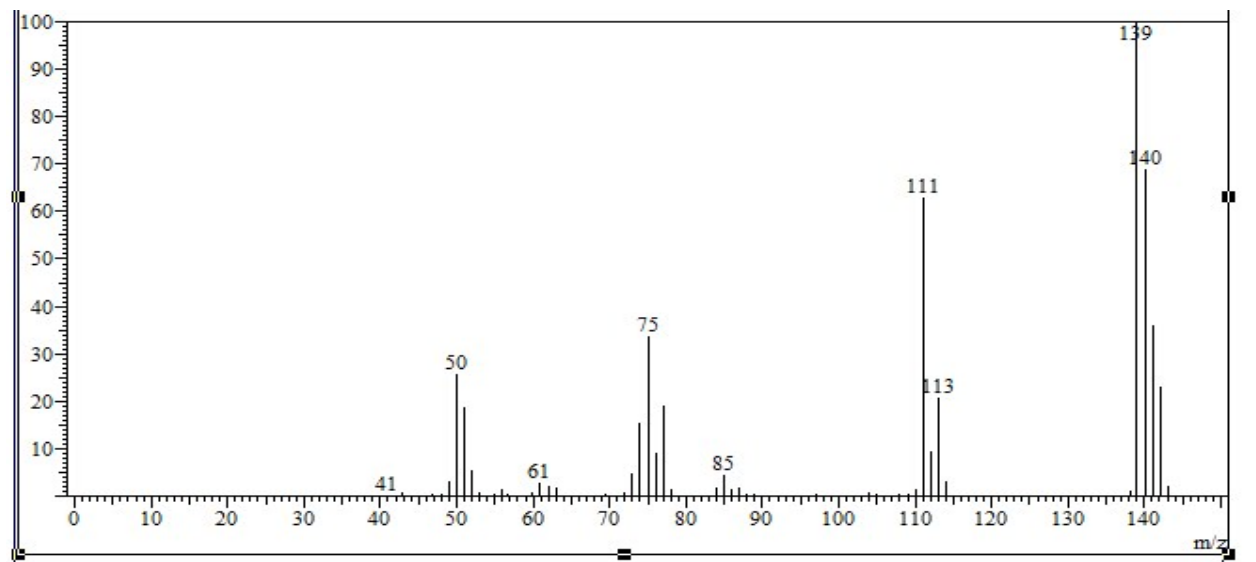

### 6. 4-Cyanobenzaldehyde

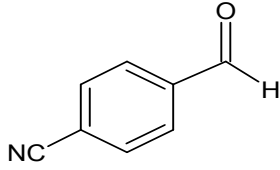

### <sup>1</sup>H NMR

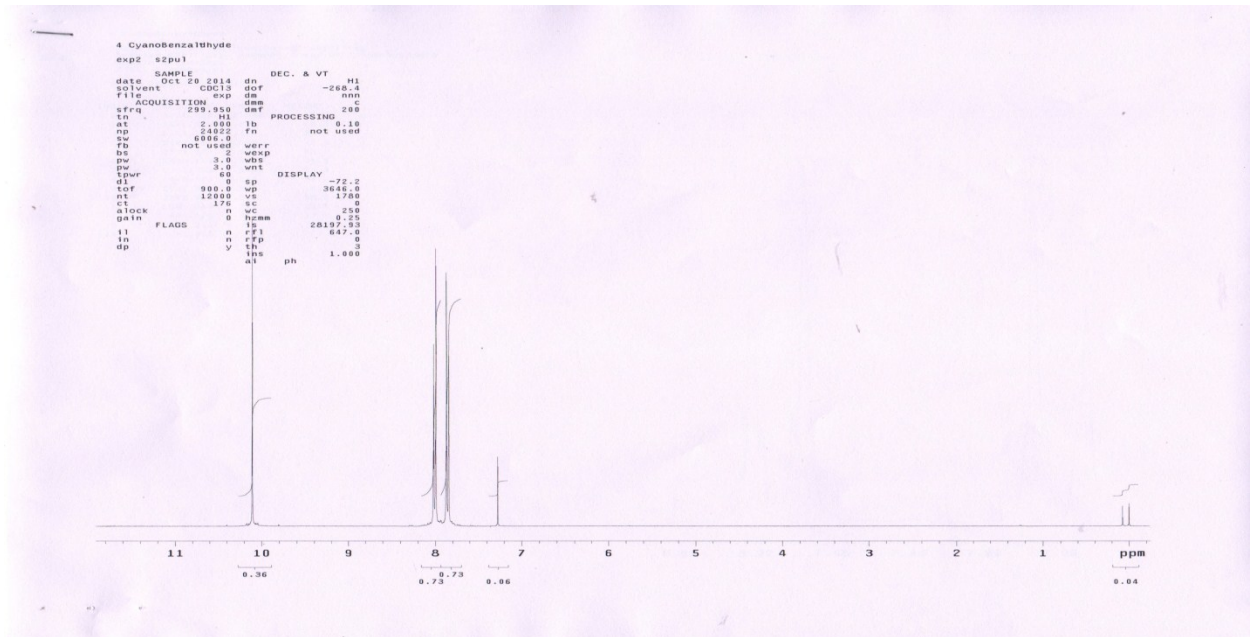

### GC-MS

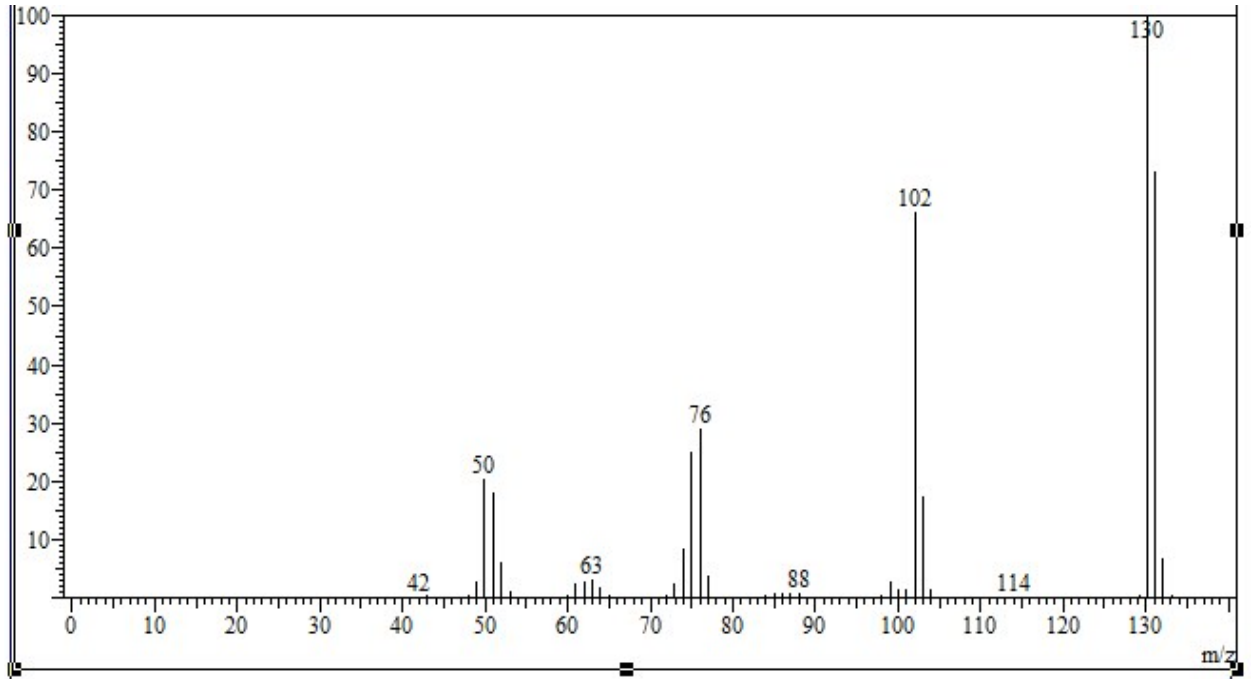

### 7. 4-Nitro Acetophenone

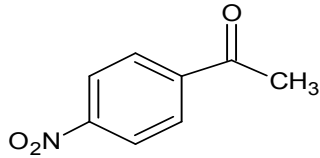

### <sup>1</sup>H NMR

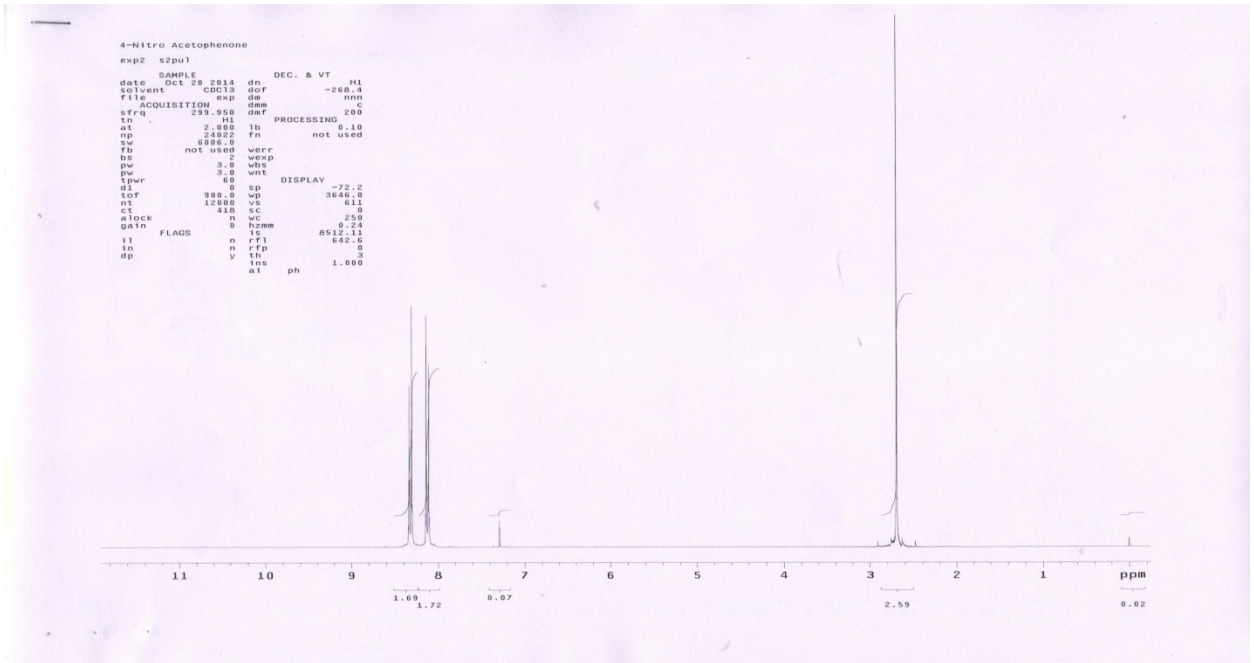

### GC-MS

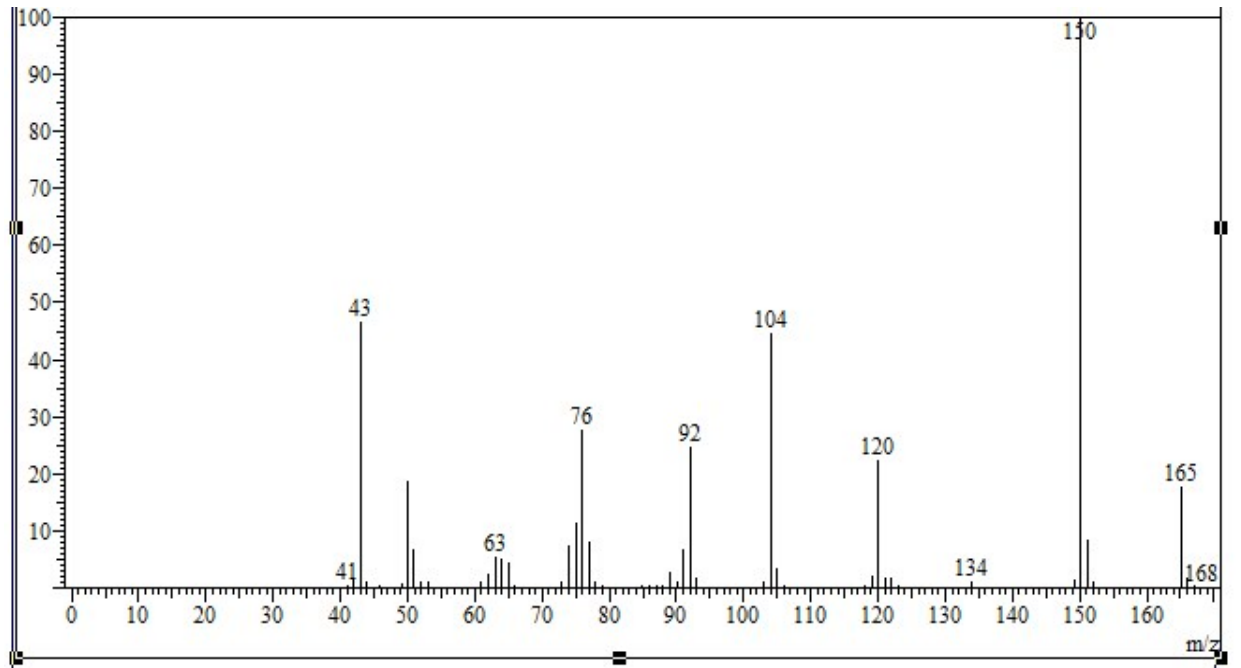

### 8. Cyclohexanone



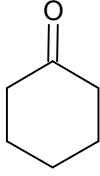

### <sup>1</sup>H NMR

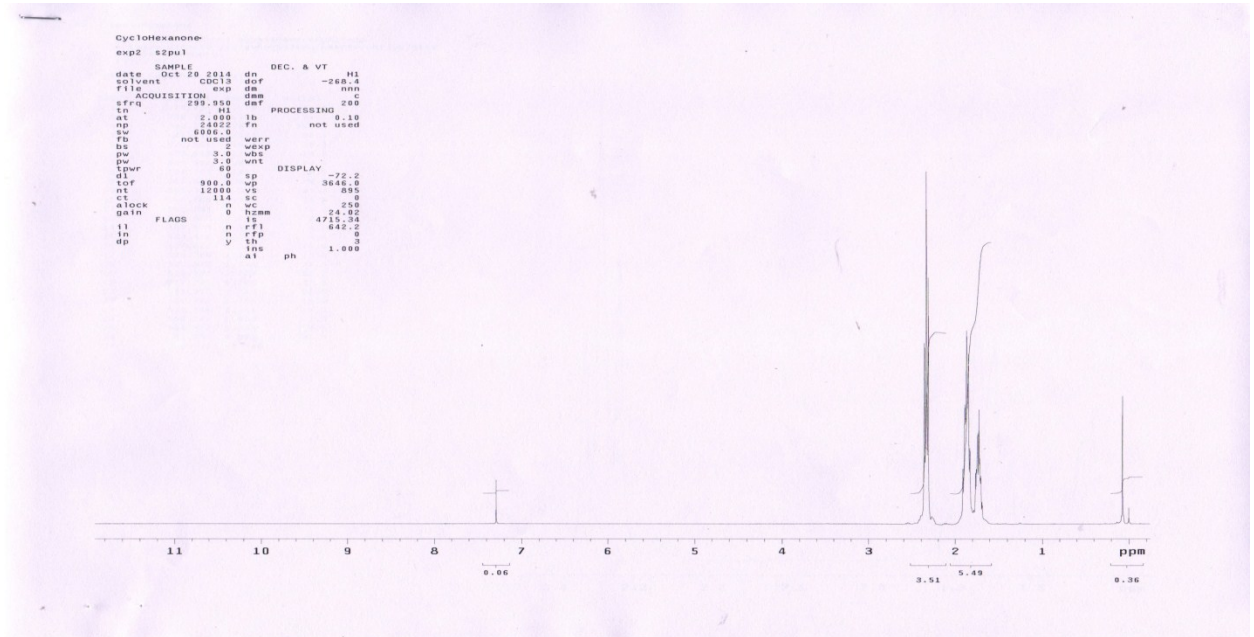

### GC-MS

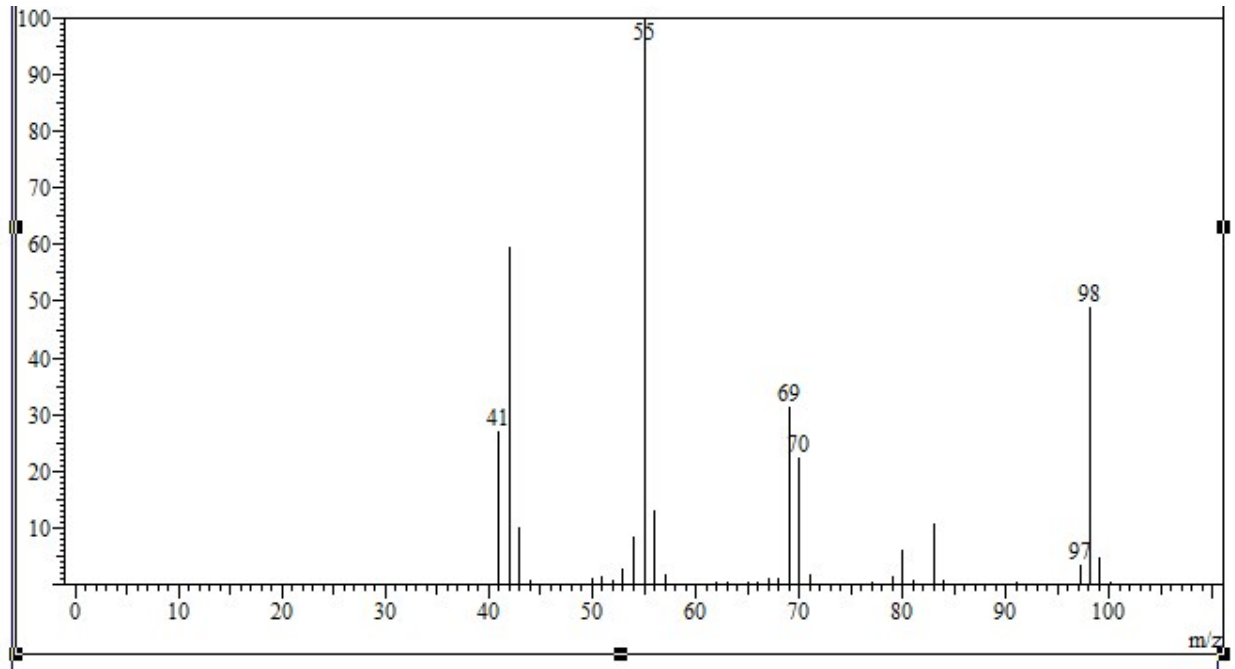

### 9. Cycloheptanone

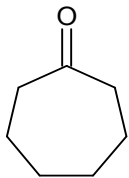

### <sup>1</sup>H NMR

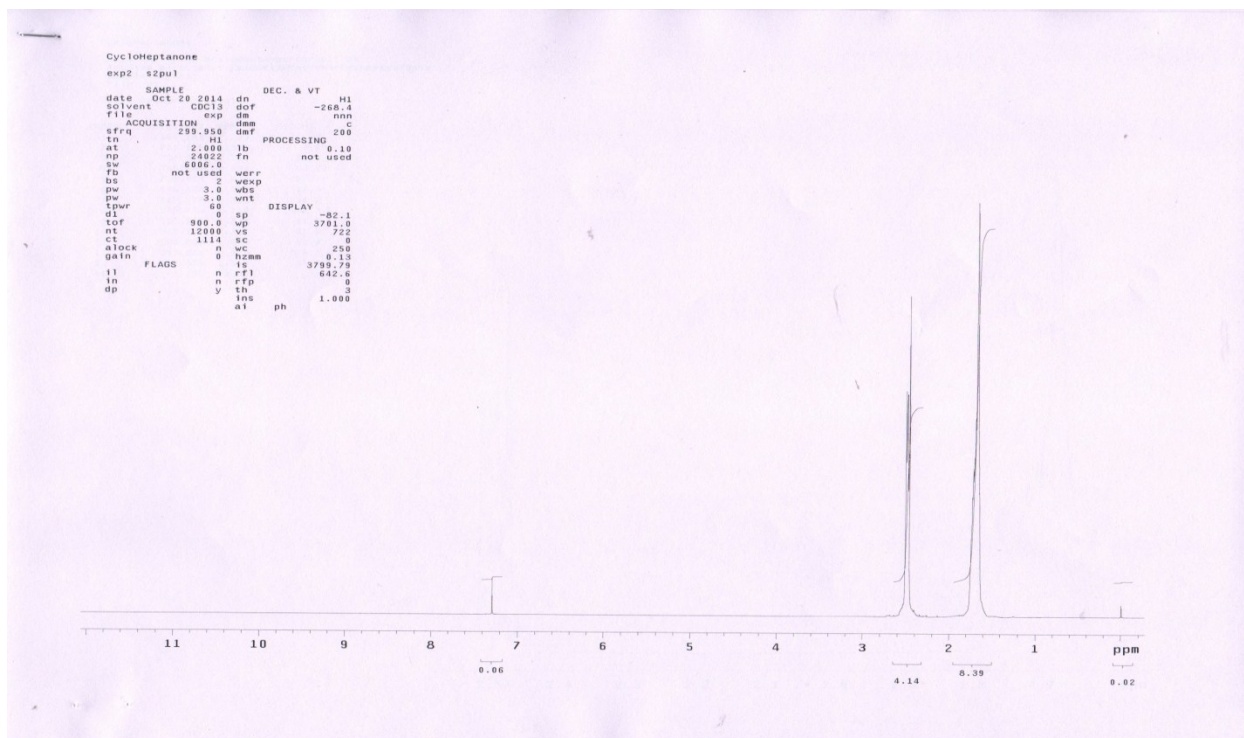

### GC-MS

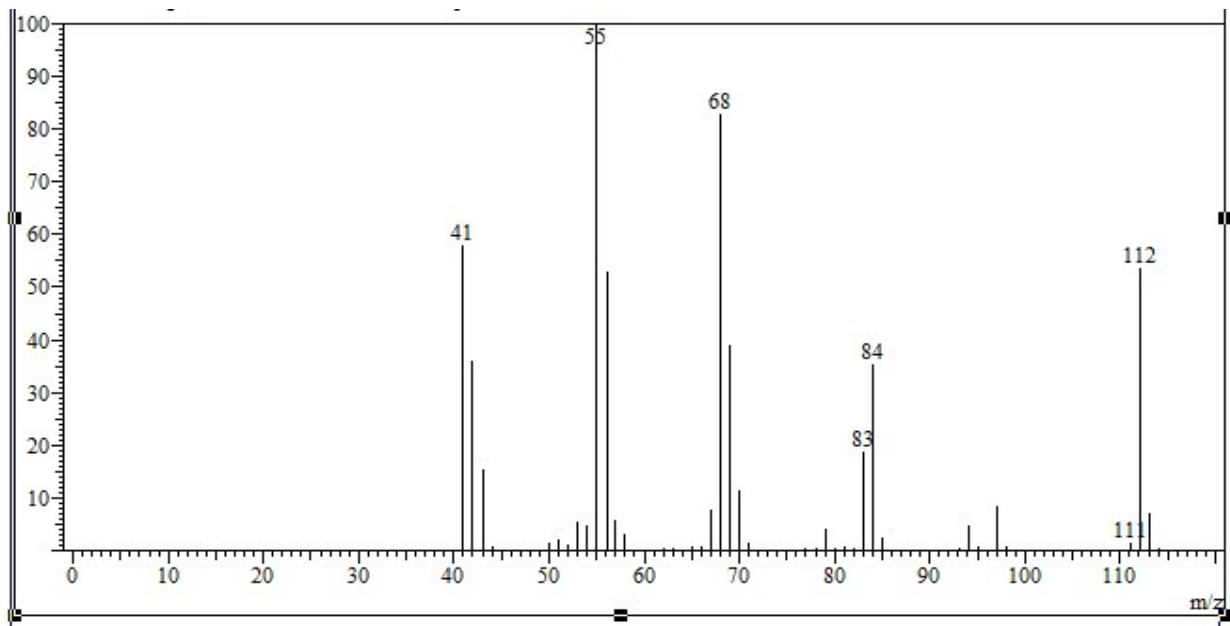

10. 2-Pyridinecarboxaldehyde

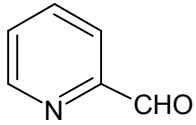

**<sup>1</sup>H NMR**

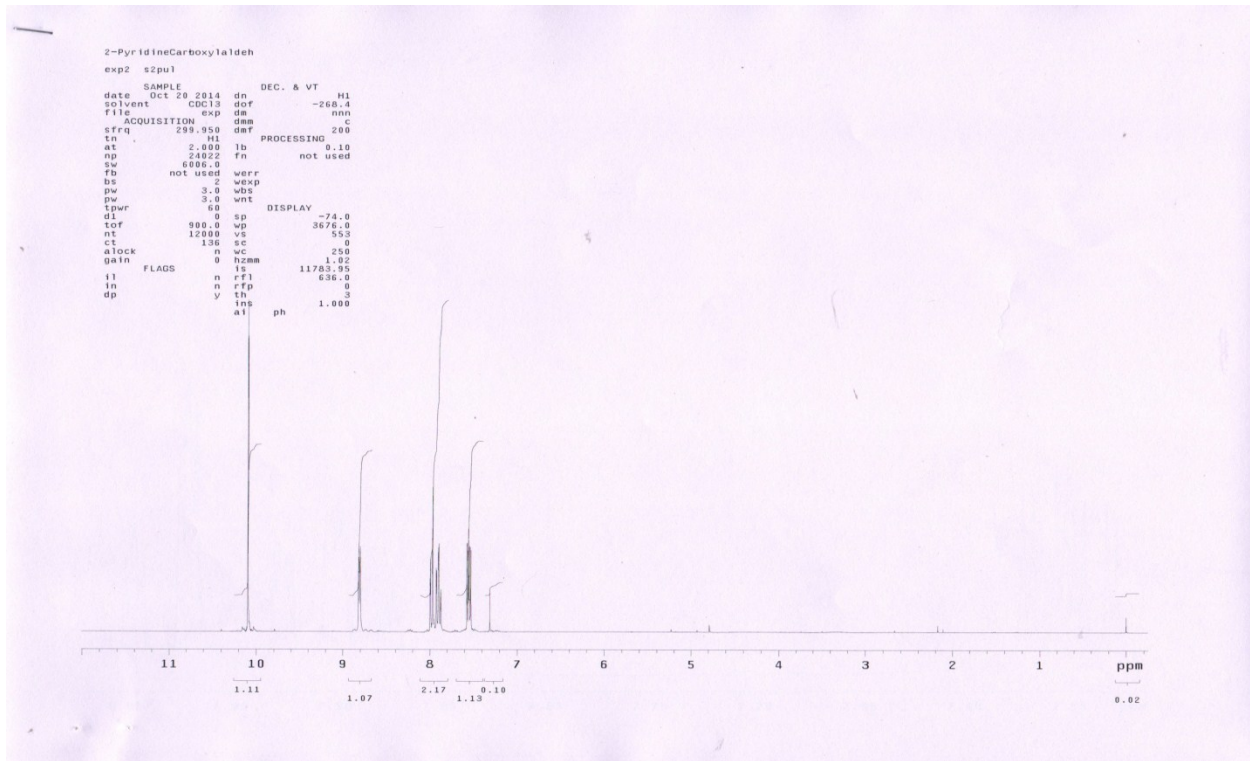

### 11. 2-Thiophenecarboxaldehyde

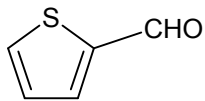

**<sup>1</sup>H NMR**

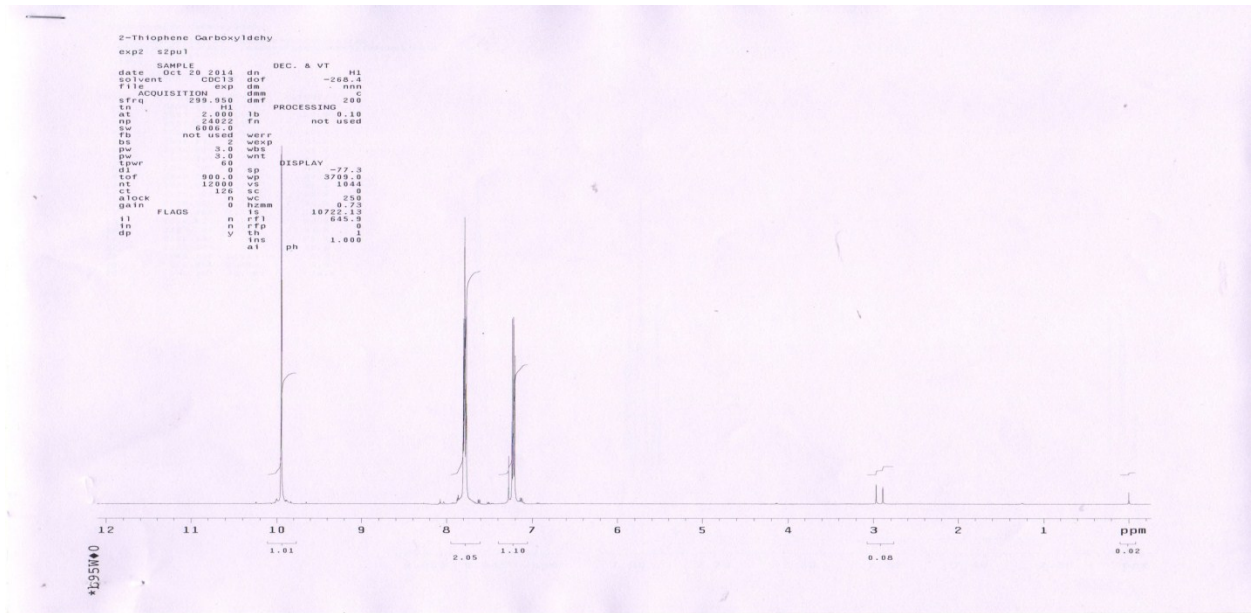

## GC-MS

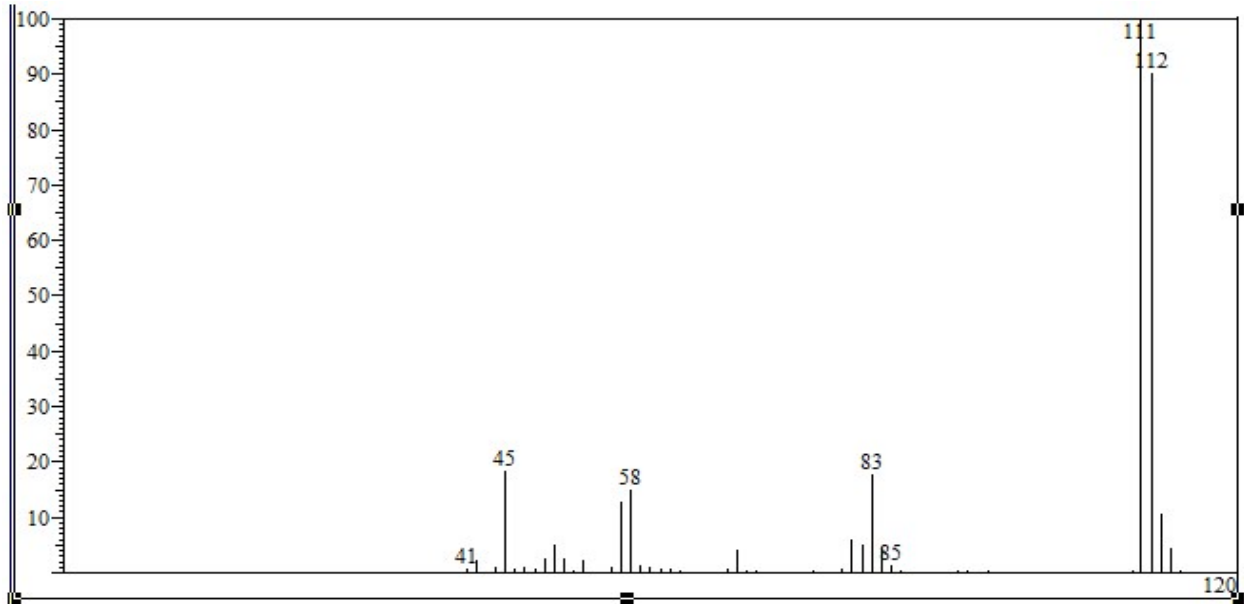

## 12. Cinnamaldehyde

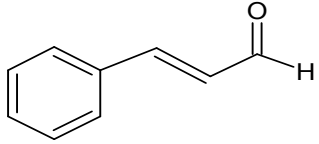

### <sup>1</sup>H NMR

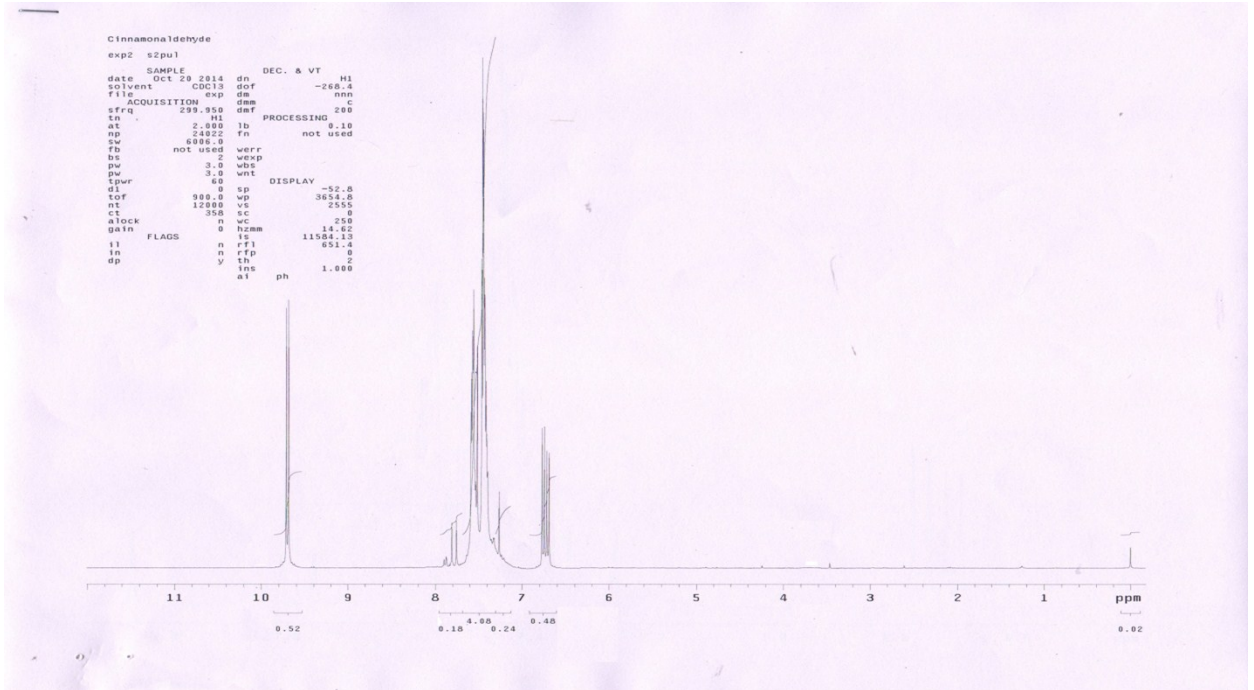

### GC-MS

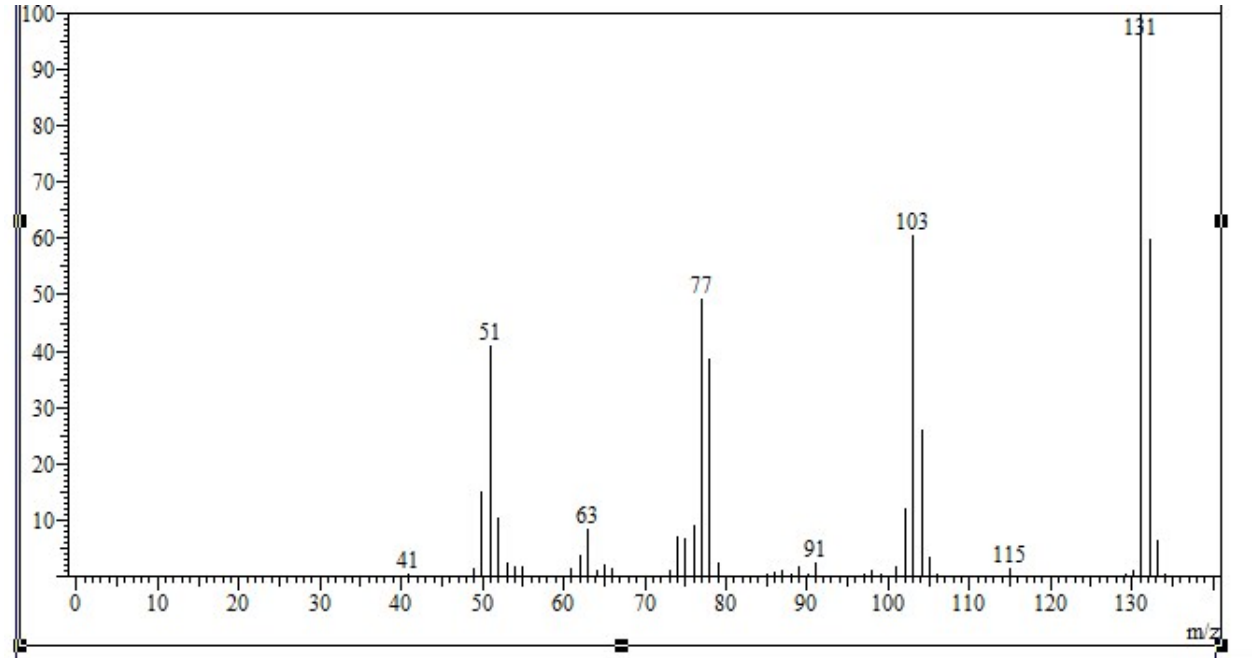

Supplement: c5ra05046d1.pdf [file c5ra05046d1.pdf]
