# Supplementary material for: Oxidant free dehydrogenation of alcohols using chitosan/polyacrylamide entrapped Ag nanoparticles
Source: Royal Society of Chemistry journal article supplement (doi:10.1039/c5ra05046d), 2015-01-01
Supplement: c5ra05046d2.pdf [file c5ra05046d2.pdf]

## Oxidant- free dehydrogenation of alcohols using chitosan/polyacrylamide entrapped Ag nano particles

Deepak K. Kurhe, Thomson A. Fernandes, Tushar S. Deore and Radha V. Jayaram\*

Department of Chemistry, Institute of Chemical Technology

Matunga, Mumbai, India 400 019

E-mail: rv.jayaram@ictmumbai.edu.in

Tel. + 91 22 3361 2607

### Supporting information

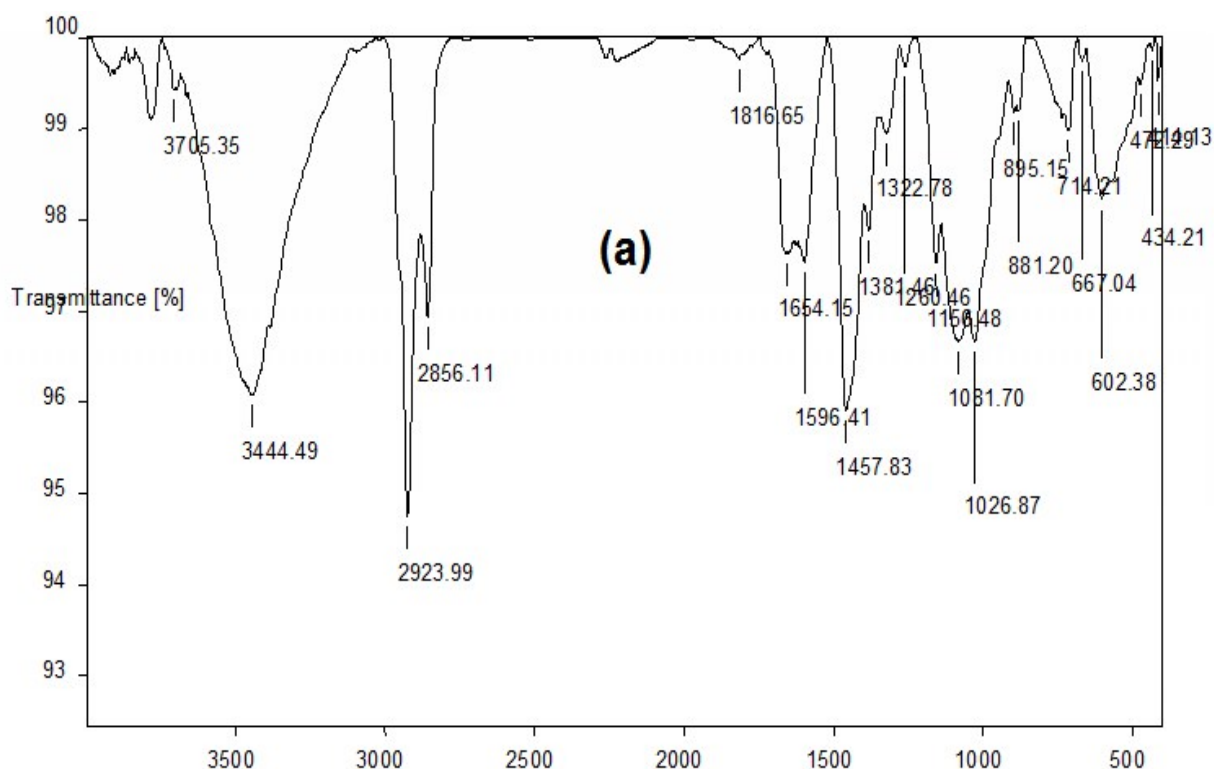

Fig. S1 (a) FTIR spectrum of chitosan

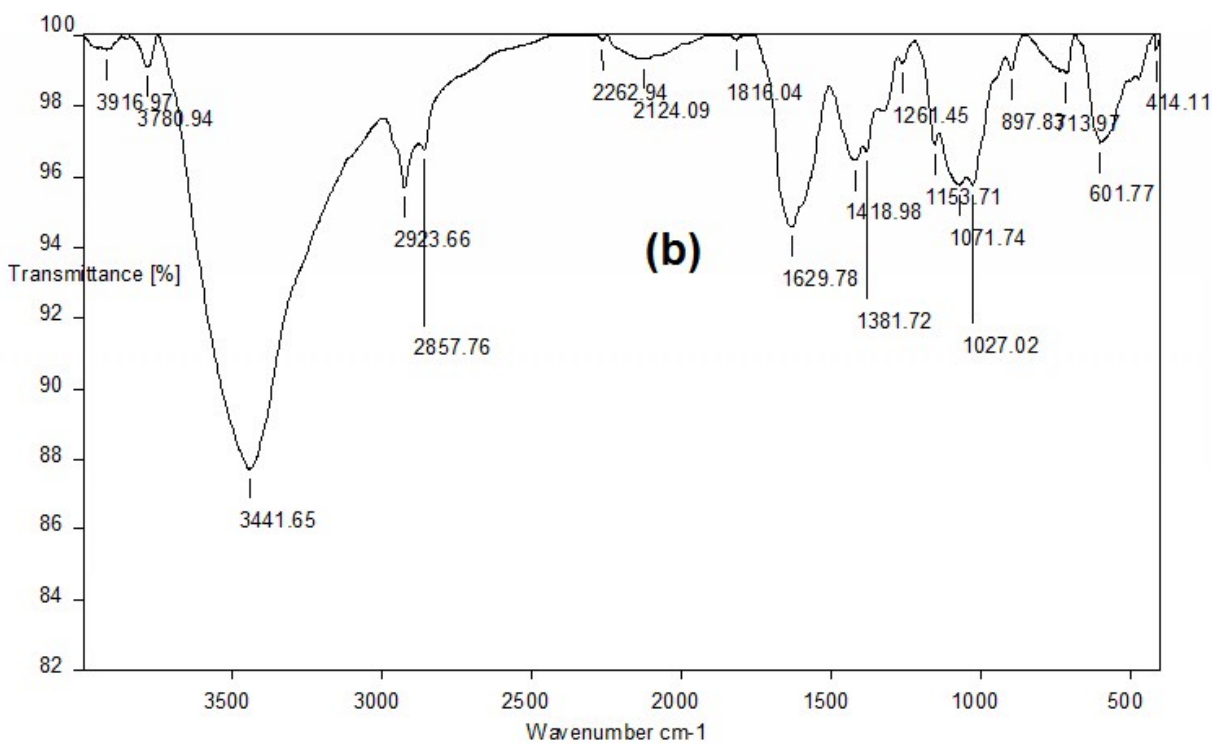

**Fig. S1 (b) FTIR spectrum of Ag/chitosan**

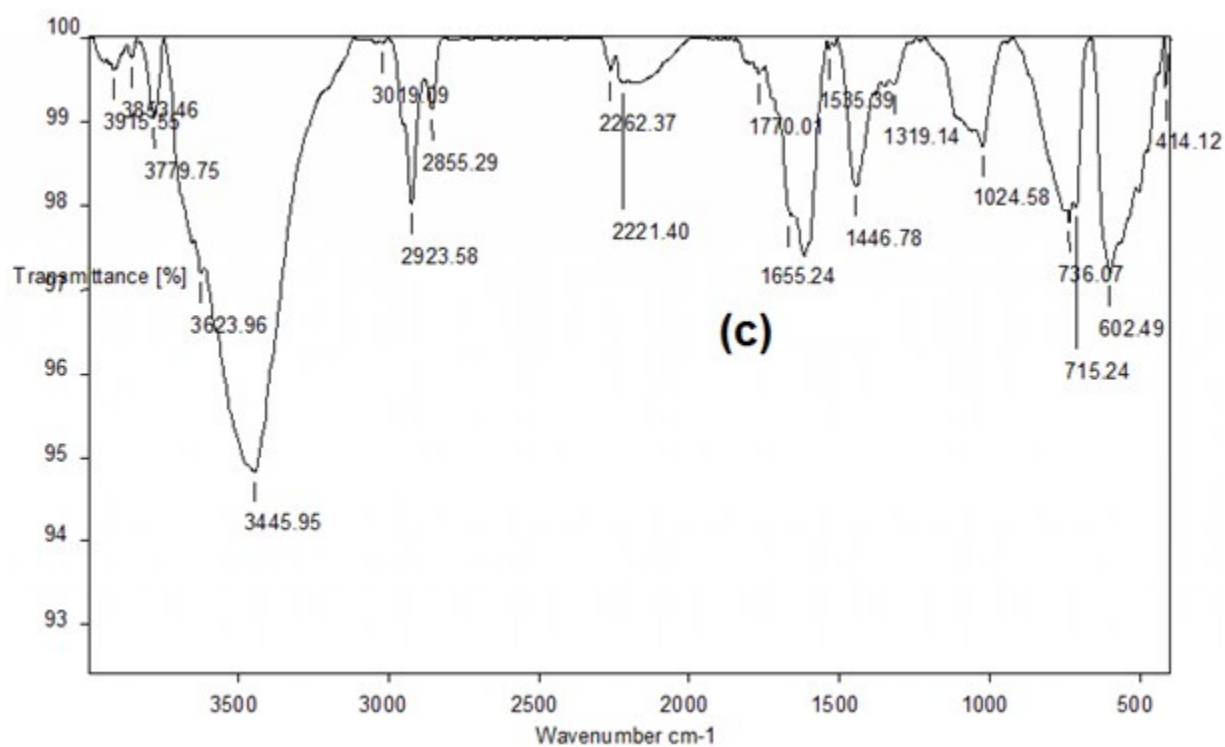

**Fig. S1 (C) FTIR spectrum of Ag@IPN**

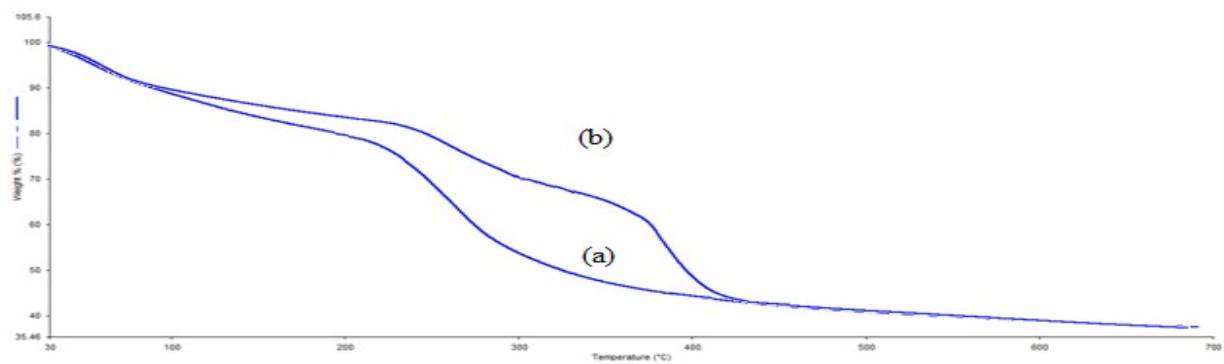

**Fig. S2** TGA curves of Ag/chitosan (a) and Ag@IPN (b)

**Transmission electron micrographs of silver in chitosan (a&b) and chitosan-polyacrylamide IPN networks (c &d)**

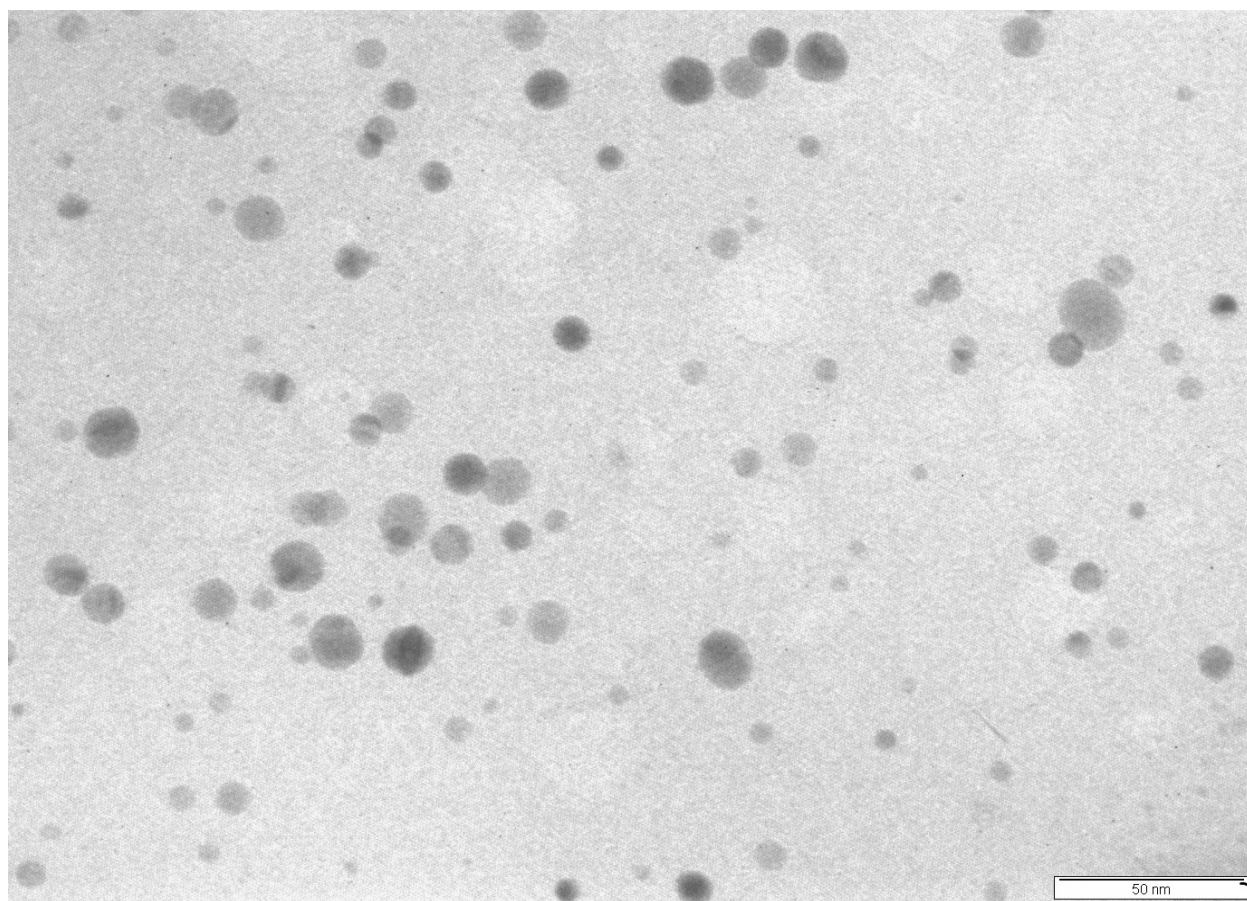

**Fig: S3 (a)** TEM image of silver particles in chitosan

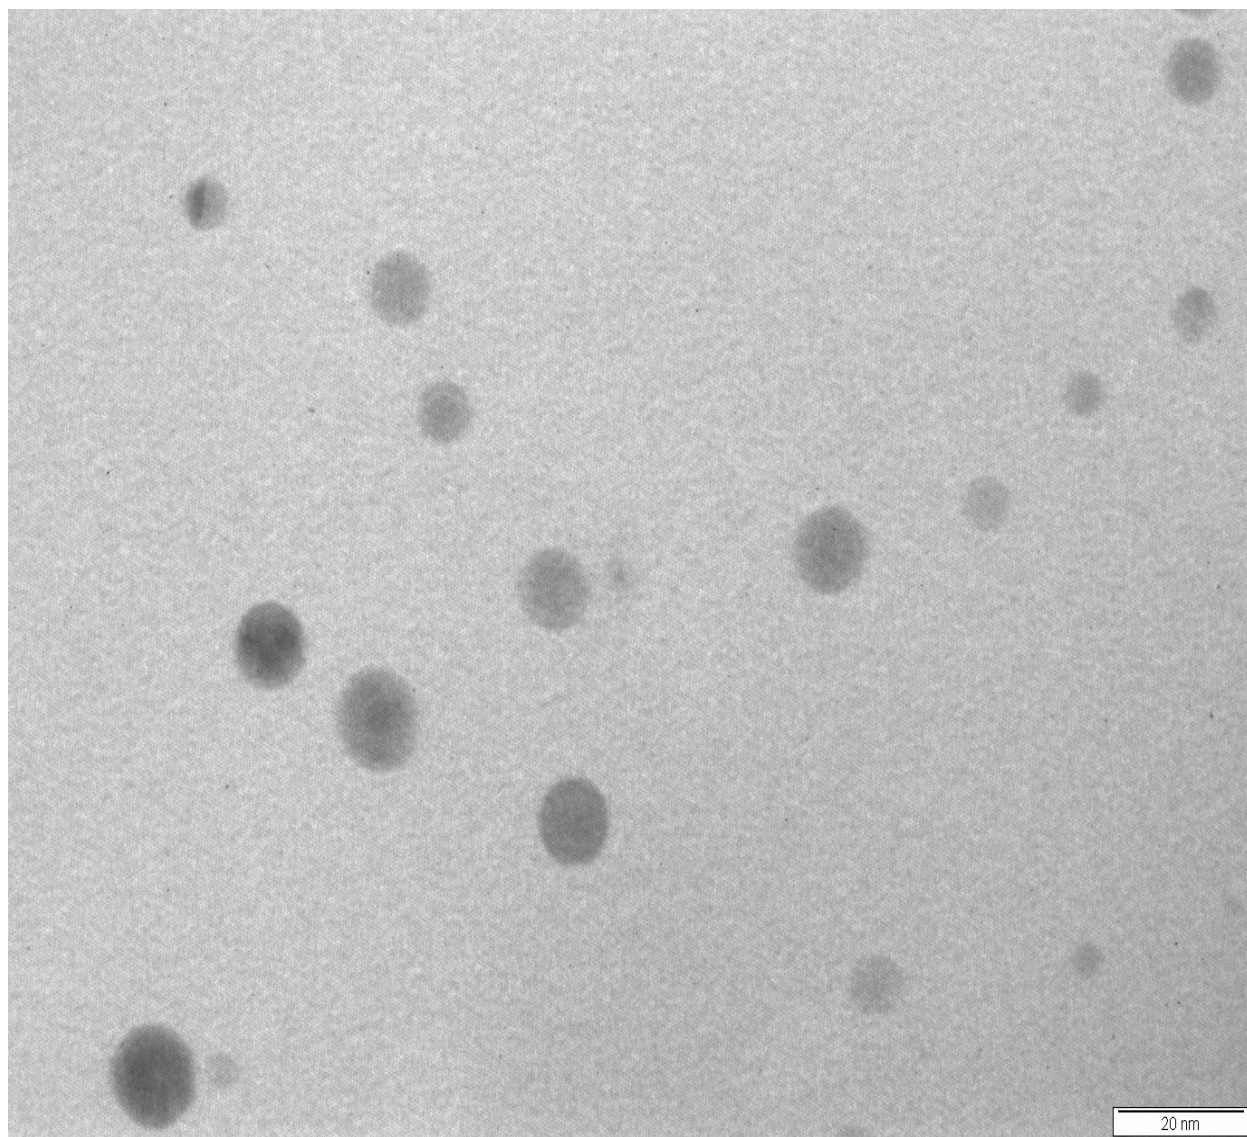

**Fig: S3 (b) TEM image of silver particles in chitosan**

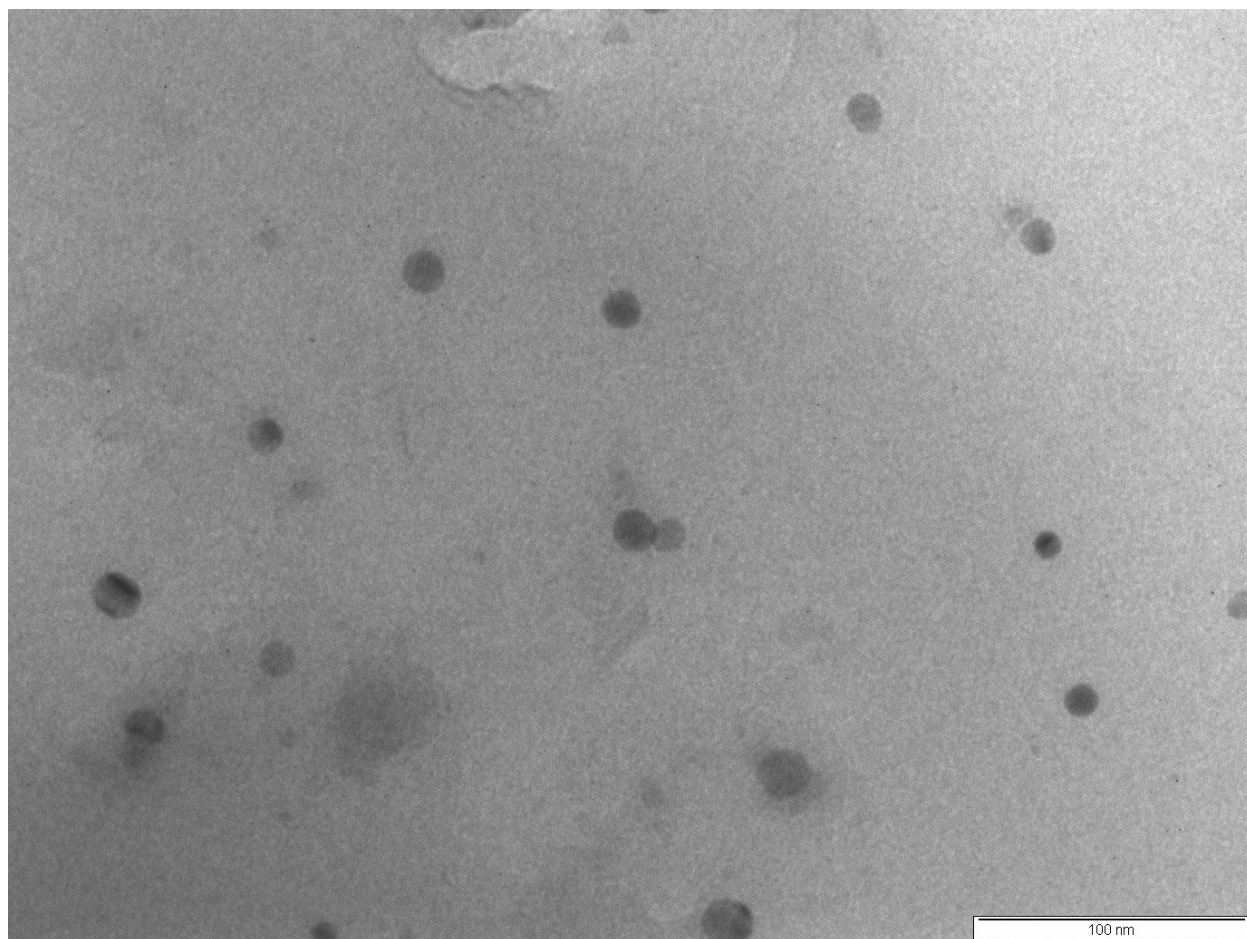

**Fig: S3 (c) TEM image of silver particles in chitosan-polyacrylamide IPN network**

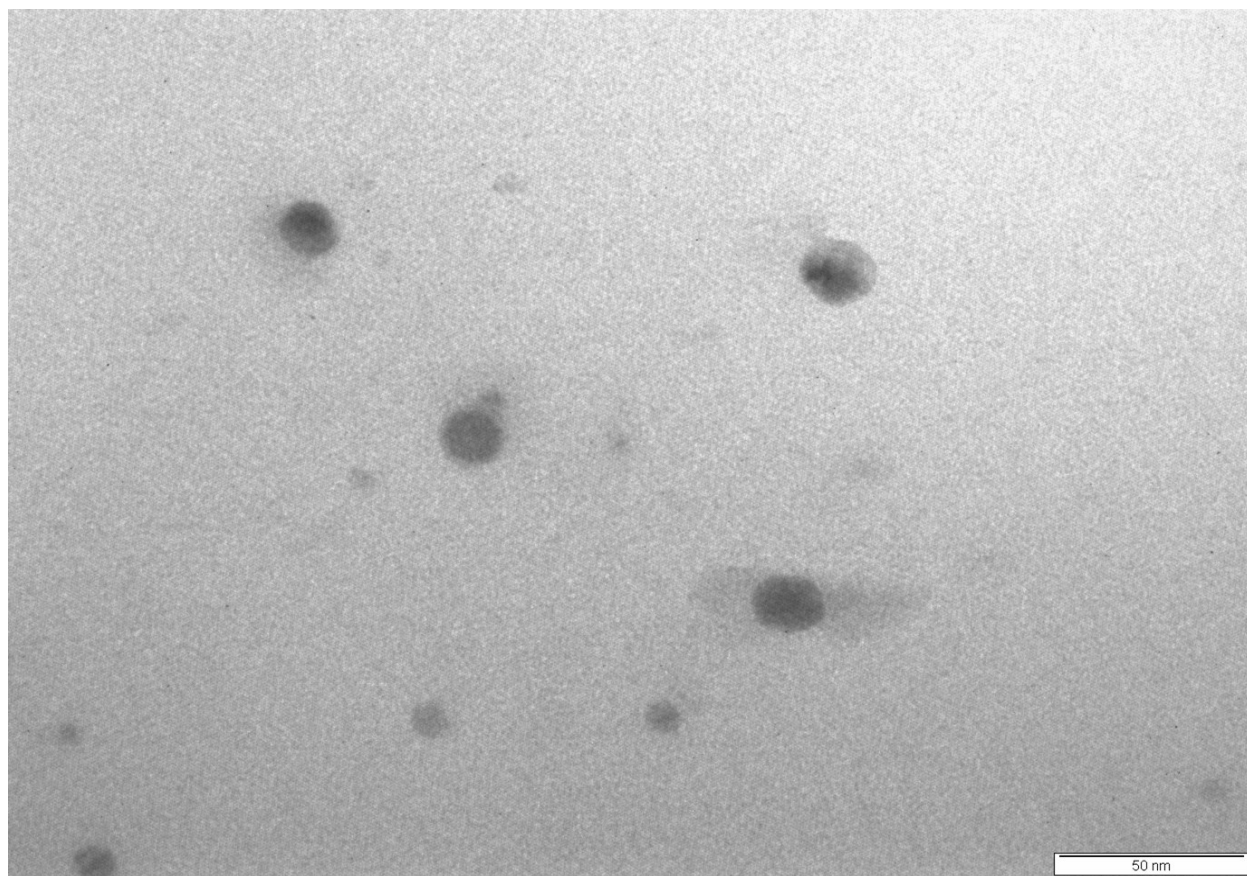

**Fig. S3 (d) TEM image of silver particles in chitosan-polyacrylamide IPN network**

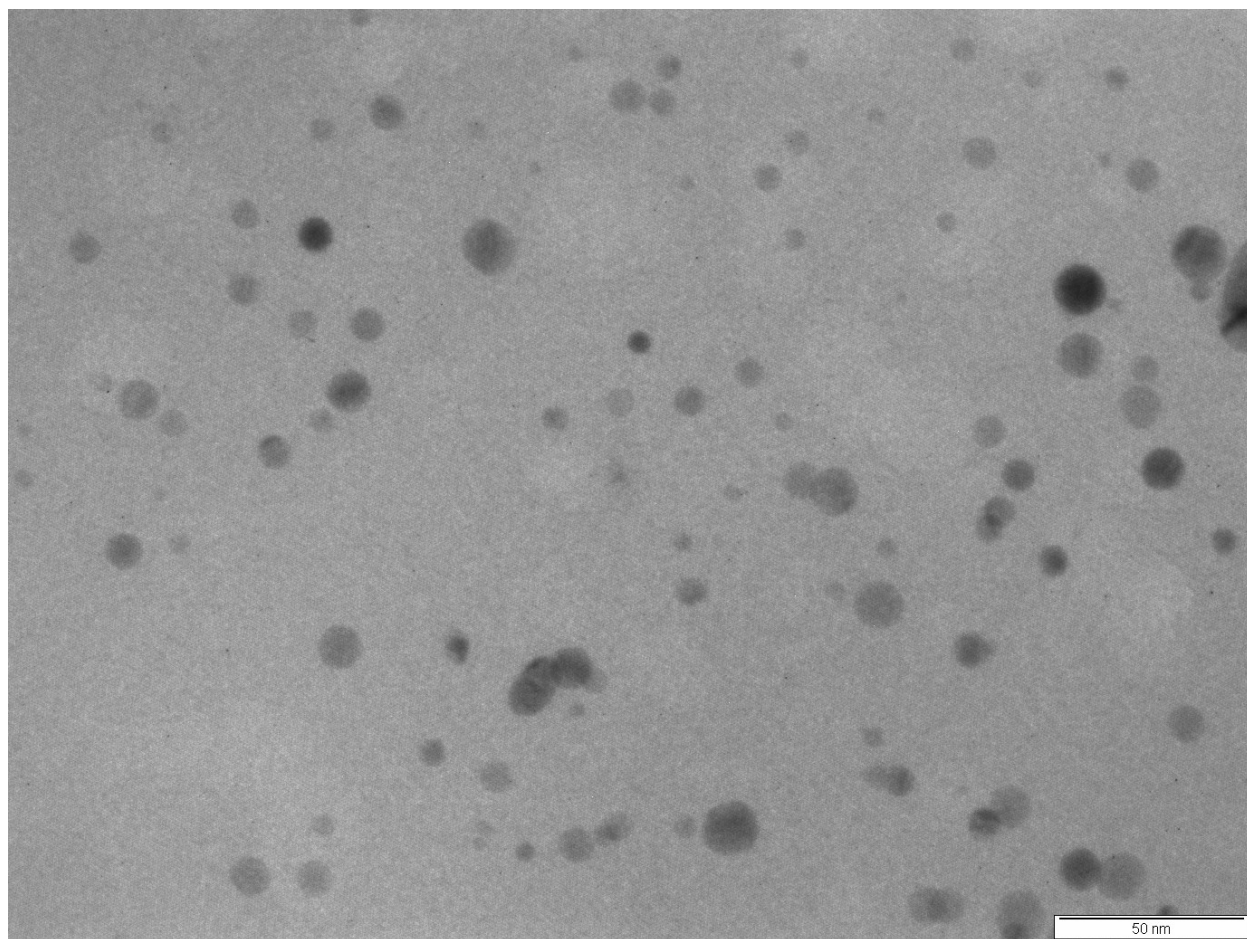

**Fig. S4 (a)** TEM image of Ag/chitosan catalyst after 7<sup>th</sup> cycle

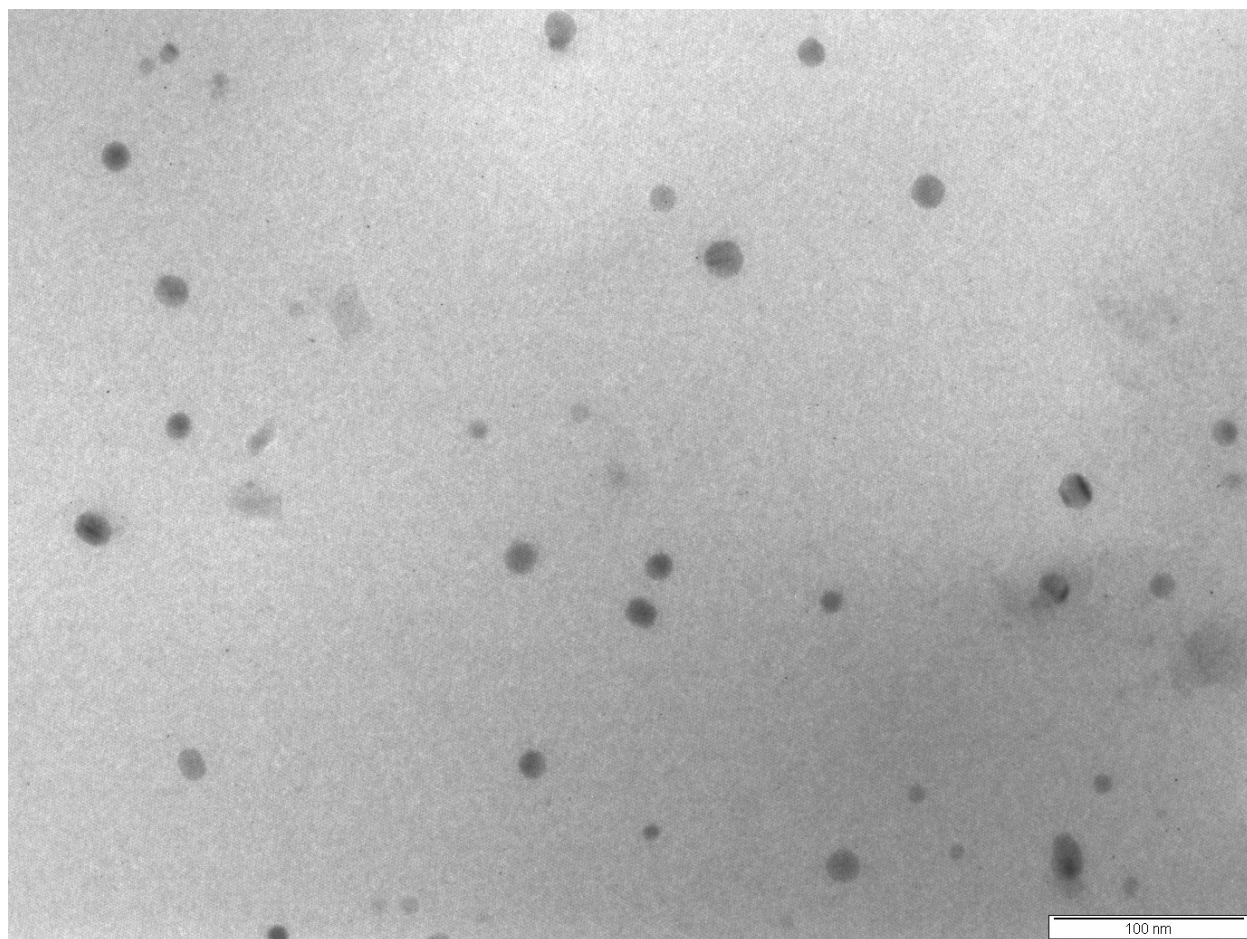

**Fig. S4 (b) TEM image of Ag@IPN catalyst after 7<sup>th</sup> cycle**

## Plausible mechanism

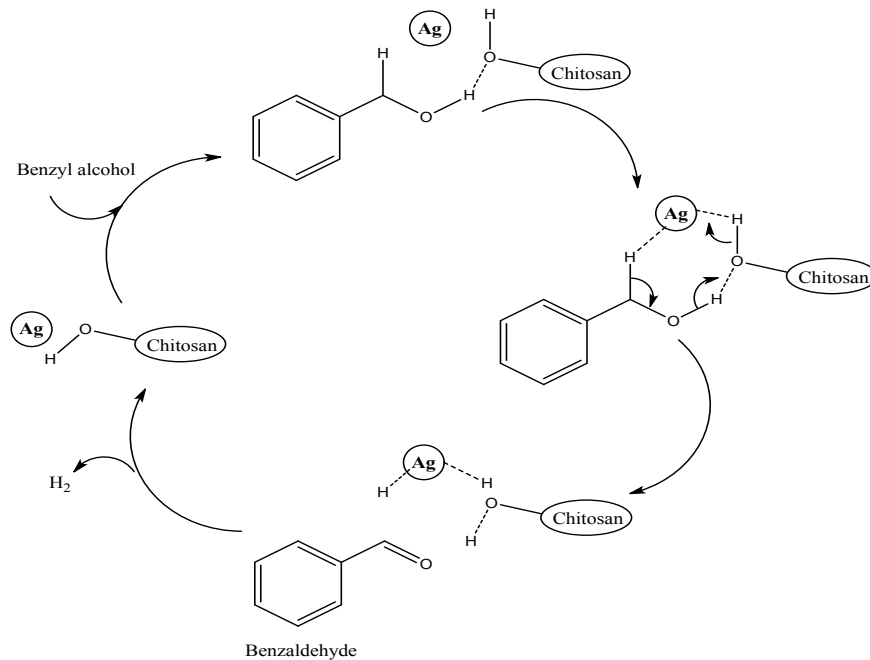

In the first step, interaction of benzyl alcohol with –OH groups of chitosan by hydrogen bond interaction occurs. In the next step, cleavage of C-H bond of alcohol takes place to form aldehyde and adsorption of  $H_2$  on silver. In the last step catalyst is regenerated with desorption of  $H_2$  from silver nano particles.

### Reference

Silver Nanoparticles Supported on Silica-Coated Ferrite as Magnetically and Reusable Catalyst for Oxidant-Free Alcohol Dehydrogenation

Ahmad Bayat, Mehdi Shakourian-Fard, Nona Ehyaei, Mohammad Mahmoodi Hashemia\*

(Accepted Manuscript, article in press, RSC Advances)
